# Supplementary material for: A CdxZn1−xS/TiO2 nanotube array electrode for a highly sensitive and selective nonenzymatic photoelectrochemical glucose sensor
Source: Royal Society of Chemistry journal article supplement (doi:10.1039/d2nj00549b), 2022-01-01
Supplement: d2nj00549b1.pdf [file d2nj00549b1.pdf]

## **A Cd<sub>x</sub>Zn<sub>1-x</sub>S/TiO<sub>2</sub> Nanotube Array electrode for a highly sensitive and selective nonenzymatic photoelectrochemical glucose sensor**

### **Supporting information**

Fatemeh Ostad Esmaeili <sup>a</sup> and Mahboubeh Tasviri <sup>\*a</sup>

---

*Department of Physical Chemistry, Faculty of Chemistry and Petroleum Sciences  
Shahid Beheshti University, Tehran, Iran.  
E-mail: m\_tasviri@sbu.ac.ir*

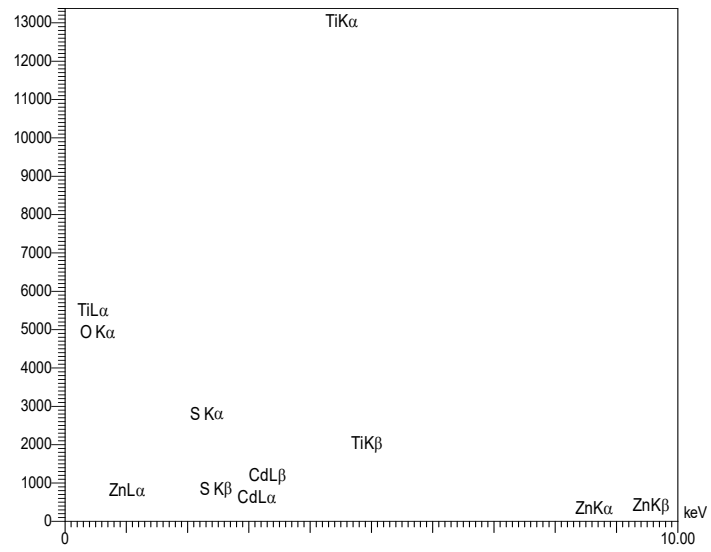

**Figure 1.** EDS spectrum of the synthesized  $Cd_xZn_{1-x}S-5/TiO_2$  NTA.

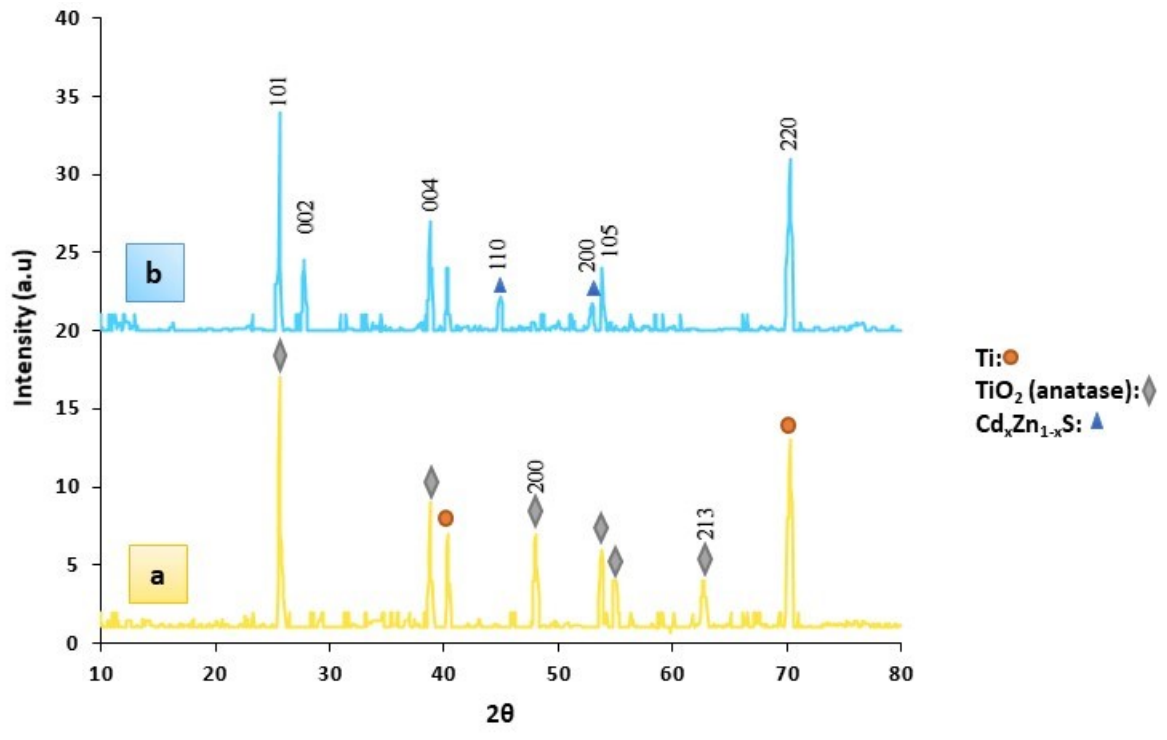

Figure 2. X-ray diffraction patterns of a)  $\text{TiO}_2$  NTA and b)  $\text{Cd}_x\text{Zn}_{1-x}\text{S}$ -5/ $\text{TiO}_2$  NTA.

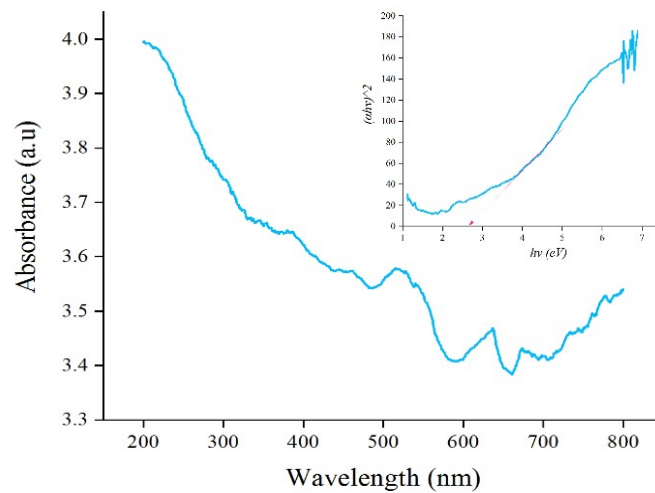

**Figure 3.** UV-vis diffuse reflectance spectra for Cd<sub>x</sub>Zn<sub>1-x</sub>S/TiO<sub>2</sub> NTA. Inset: plots of  $(\alpha h\nu)^2$  versus photon energy ( $h\nu$ ).

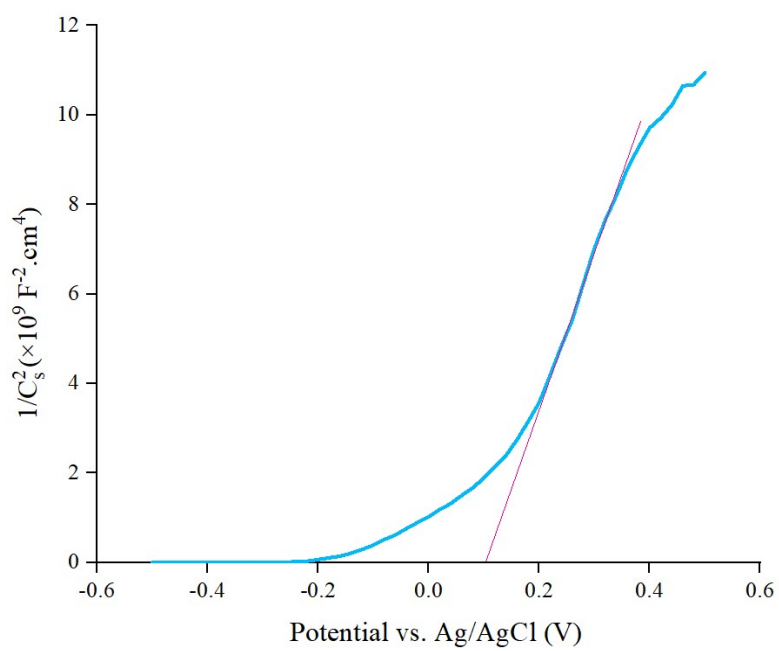

**Figure 4.** Mott-Schottky analysis of  $\text{Cd}_x\text{Zn}_{1-x}\text{S}/\text{TiO}_2$  NTA in a constant frequency of 1000 Hz in 0.1 M  $\text{NaNO}_3$  solution.

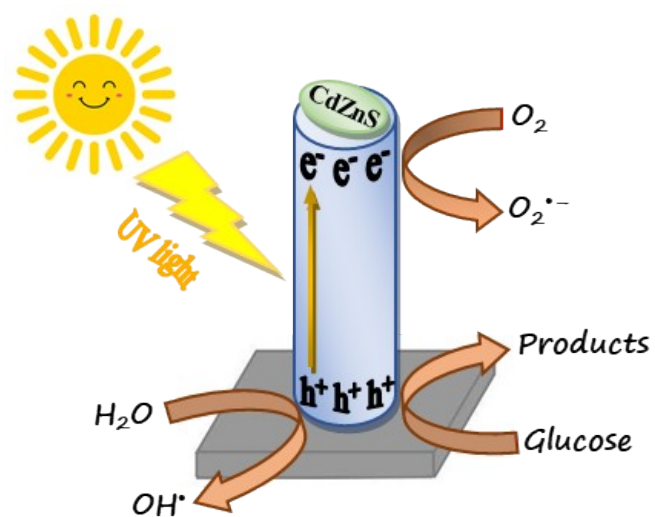

**Scheme 1.** Schematic illustration of the photoelectrochemical process for the oxidation of glucose by the  $Cd_xZn_{1-x}S-5/TiO_2$  NTAs electrode.
